# Supplementary material for: Human Adult Renal Progenitor Cells Prevent Cisplatin-Nephrotoxicity by Inducing CYP1B1 Overexpression and miR-27b-3p Down-Regulation through Extracellular Vesicles
Source: MDPI journal article supplement (doi:10.3390/cells12121655), 2023-06-17
Supplement: s1 [file s1]

**Supplementary Table S1**

## Primer Sequences and lncRNAs assay

|           |                                                                                                                                                                                                          |
|-----------|----------------------------------------------------------------------------------------------------------------------------------------------------------------------------------------------------------|
| CYP1B1    | for: 5'-CCTCTTCACCAGGTATCC-3'<br>rev: 5'- ATGAGGAATAGTGACAGGC                                                                                                                                            |
| BAX       | For: 5'- TTTGCTTCAGGGTTTCATCC-3'<br>Rev: 5'-CAGTTGAAGTTGCCGTCAGA-3'                                                                                                                                      |
| MIR210HG  | RT <sup>2</sup> lncRNA qPCR Assay for Human MIR210HG (LPH15919A)<br>Entrez gene ID: 100506211<br>Detected transcript: NR_038262 (2303 bp)<br>ENST00000500447<br>Amplicon size: 84 bp                     |
| LINC00511 | RT <sup>2</sup> lncRNA qPCR Assay for Human LINC00511 (LPH06350A)<br>Entrez gene ID: 400619<br>Detected transcripts<br>NR_033876 (2265 bp)<br>ENST00000580861<br>ENST00000581549<br>Amplicon size: 78 bp |

Supplementary Figure S1

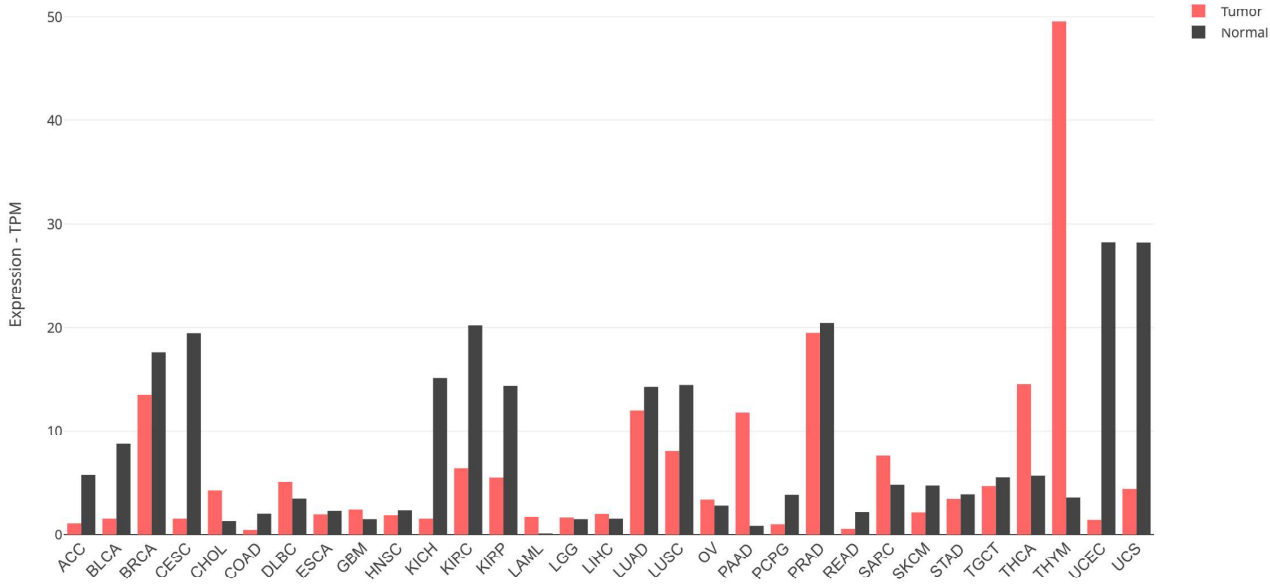

| TCGA | Detail                                                           |
|------|------------------------------------------------------------------|
| ACC  | Adrenocortical carcinoma                                         |
| BLCA | Bladder Urothelial Carcinoma                                     |
| BRCA | Breast invasive carcinoma                                        |
| CESC | Cervical squamous cell carcinoma and endocervical adenocarcinoma |
| CHOL | Cholangio carcinoma                                              |
| COAD | Colon adenocarcinoma                                             |
| DLBC | Lymphoid Neoplasm Diffuse Large B-cell Lymphoma                  |
| ESCA | Esophageal carcinoma                                             |
| GBM  | Glioblastoma multiforme                                          |
| HNSC | Head and Neck squamous cell carcinoma                            |
| KICH | Kidney Chromophobe                                               |
| KIRC | Kidney renal clear cell carcinoma                                |
| KIRP | Kidney renal papillary cell carcinoma                            |
| LAML | Acute Myeloid Leukemia                                           |
| LGG  | Brain Lower Grade Glioma                                         |
| LIHC | Liver hepatocellular carcinoma                                   |
| LUAD | Lung adenocarcinoma                                              |
| LUSC | Lung squamous cell carcinoma                                     |
| MESO | Mesothelioma                                                     |
| OV   | Ovarian serous cystadenocarcinoma                                |
| PAAD | Pancreatic adenocarcinoma                                        |
| PCPG | Pheochromocytoma and Paraganglioma                               |
| PRAD | Prostate adenocarcinoma                                          |
| READ | Rectum adenocarcinoma                                            |
| SARC | Sarcoma                                                          |
| SKCM | Skin Cutaneous Melanoma                                          |
| STAD | Stomach adenocarcinoma                                           |
| TGCT | Testicular Germ Cell Tumors                                      |
| THCA | Thyroid carcinoma                                                |
| THYM | Thymoma                                                          |
| UCEC | Uterine Corpus Endometrial Carcinoma                             |
| UCS  | Uterine Carcinosarcoma                                           |
| UVM  | Uveal Melanoma                                                   |

**Figure S1. CYP1B1 expression in Cancer.** Bar plot showing the CYP1B1 expression in listed cancers and in relative normal tissue counterpart. TPM, transcripts per million; Bar plot was generated by generated by Gene Expression Profiling Interactive Analysis.

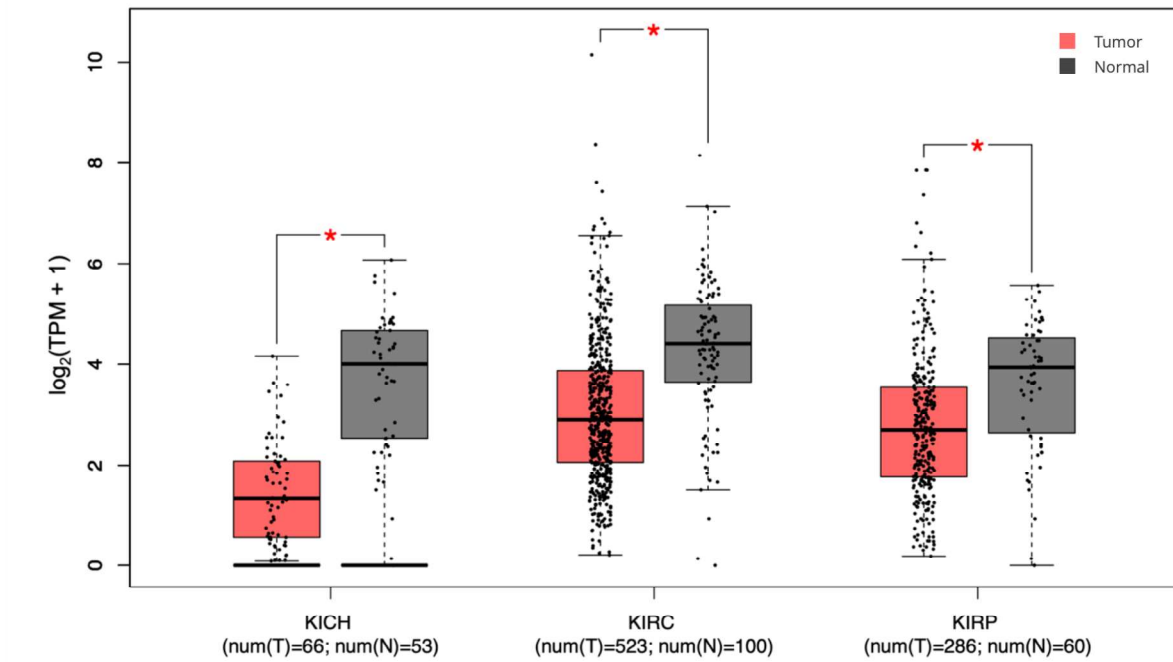

**Supplemental Figure S2.** Differential Analysis of CYP1B1 RNA sequencing expression data from tumoral tissue biopsy samples and normal samples of the TCGA and the GTEx projects. The CYP1B1 expression is lower in RCC tissue (Red box) than normal tissue (gray box). The method for differential analysis is one-way ANOVA, using disease state (Tumor or Normal) as variable for calculating differential expression. The expression data were first  $\log_2(\text{TPM} + 1)$  transformed for differential analysis and the  $\log_2\text{FC}$  is defined as  $\text{median}(\text{Tumor}) - \text{median}(\text{Normal})$ . Genes with higher  $|\log_2\text{FC}|$  values and lower q values than pre-set thresholds are considered differentially expressed genes. TPM, transcripts per million; T, Tumor; N, Normal; KICH, kidney chomophobe carcinoma; KIRC, kidney renal clear cell carcinoma; KIRP, renal papillary cell carcinoma.
